# Supplementary material
Source: PubMed Central journal article supplement (PMC2837481)
Supplement: NIHMS181537-supplement-How_to.pdf [file NIHMS181537-supplement-How_to.pdf]

## Supplemental Figure 2-1

| name                                        | symbol    | CG     | plate | row | col | RNAi probe | repeats           | cell/image | mitotic index | ht    | positive control | manual hits | computer hits                                                     | remarks                                                                  | galleries | GFP localization | Action |
|---------------------------------------------|-----------|--------|-------|-----|-----|------------|-------------------|------------|---------------|-------|------------------|-------------|-------------------------------------------------------------------|--------------------------------------------------------------------------|-----------|------------------|--------|
| CG1347                                      |           | 31347  | 129   | A   | 1   | probe info |                   | 95.45      | 5.81%         | No    | No               |             |                                                                   |                                                                          | 1.2       |                  |        |
| CG14391                                     |           | 14391  | 129   | A   | 2   | probe info |                   | 94.43      | 8.50%         | No    | No               |             |                                                                   |                                                                          | 1.2.3     |                  |        |
| CG14394                                     |           | 14394  | 129   | A   | 3   | probe info |                   | 97.69      | 10.97%        | No    | No               |             |                                                                   |                                                                          | 1.2.3.4   |                  |        |
| beat-1/c                                    |           | 14390  | 129   | A   | 4   | probe info |                   | 91.29      | 5.27%         | No    | No               |             |                                                                   |                                                                          | 1.2       |                  |        |
| beat-1/a                                    |           | 10134  | 129   | A   | 5   | probe info |                   | 68.64      | 6.00%         | No    | No               |             |                                                                   |                                                                          | 1.2       |                  |        |
| beat-1/b                                    |           | 31298  | 129   | A   | 6   | probe info |                   | 108.02     | 7.14%         | No    | No               |             |                                                                   |                                                                          | 1.2.3     |                  |        |
| Spc297-GG                                   |           | CG7242 | 7242  | 129 | A   | 7          | probe info Repeat |            | 112.86        | 9.14% | Yes              | No          | Long spindle - Clear<br>Long spindle Misalign<br>Misalign - Clear | Long spindles high circ2num<br>Large spindle - Clear<br>Misalign - Clear | 1.2.3     |                  |        |
| CG14384                                     |           | 14384  | 129   | A   | 8   | probe info |                   | 96.90      | 5.95%         | No    | No               |             |                                                                   |                                                                          | 1.2       |                  |        |
| polyA-binding protein interacting protein 2 | Paip2     | 12358  | 129   | A   | 9   | probe info |                   | 119.71     | 9.43%         | No    | No               |             |                                                                   |                                                                          | 1.2.3.4   |                  |        |
| CG1342                                      |           | 31342  | 129   | A   | 10  | probe info |                   | 96.02      | 9.79%         | No    | No               |             |                                                                   |                                                                          | 1.2.3.4   |                  |        |
| CG14383                                     |           | 14383  | 129   | A   | 11  | probe info |                   | 140.21     | 8.47%         | No    | No               |             |                                                                   |                                                                          | 1.2.3.4   |                  |        |
| CG14383                                     |           | 14383  | 129   | A   | 12  | probe info |                   | 144.57     | 8.23%         | No    | No               |             |                                                                   |                                                                          | 1.2.3.4   |                  |        |
| yellow-f                                    | yellow-f  | 18550  | 129   | B   | 1   | probe info |                   | 73.62      | 7.21%         | No    | No               |             |                                                                   |                                                                          | 1.2       |                  |        |
| yellow-f2                                   | yellow-f2 | 8063   | 129   | B   | 2   | probe info |                   | 72.67      | 4.88%         | No    | No               |             |                                                                   |                                                                          | 1.2       |                  |        |
| CG17518                                     |           | 7518   | 129   | B   | 3   | probe info |                   | 88.19      | 10.88%        | No    | No               |             | short spindles                                                    |                                                                          | 1.2.3.4   |                  |        |
| CG11656                                     |           | 11656  | 129   | B   | 4   | probe info |                   | 98.67      | 7.55%         | No    | No               |             |                                                                   |                                                                          | 1.2.3     |                  |        |
| lethal (3) 87Df                             | l3/87Df   | 7820   | 129   | B   | 5   | probe info |                   | 91.90      | 8.89%         | No    | No               |             |                                                                   |                                                                          | 1.2.3     |                  |        |
| CG1157                                      |           | 31157  | 129   | B   | 6   | probe info |                   | 97.05      | 8.59%         | No    | No               |             |                                                                   |                                                                          | 1.2.3     |                  |        |
| CG17319                                     |           | 17319  | 129   | B   | 7   | probe info |                   | 101.55     | 9.90%         | No    | No               |             |                                                                   |                                                                          | 1.2.3.4   |                  |        |
| CG8508                                      |           | 8508   | 129   | B   | 8   | probe info |                   | 99.76      | 8.88%         | No    | No               |             |                                                                   |                                                                          | 1.2.3     |                  |        |
| CG14380                                     |           | 14380  | 129   | B   | 9   | probe info |                   | 71.93      | 7.55%         | No    | No               |             |                                                                   |                                                                          | 1.2       |                  |        |
| CG8141                                      |           | 8141   | 129   | B   | 10  | probe info |                   | 87.88      | 8.51%         | No    | No               |             |                                                                   |                                                                          | 1.2.3     |                  |        |
| CG8476                                      |           | 8476   | 129   | B   | 11  | probe info |                   | 74.88      | 9.70%         | No    | No               |             |                                                                   |                                                                          | 1.2.3     |                  |        |
| CG11686                                     |           | 11686  | 129   | B   | 12  | probe info |                   | 76.07      | 11.86%        | No    | No               |             |                                                                   |                                                                          | 1.2.3     |                  |        |
| Ravas                                       |           | 15889  | 129   | C   | 1   | probe info |                   | 77.60      | 7.46%         | No    | No               |             |                                                                   |                                                                          | 1.2.3     |                  |        |
| Suppressor of variegation 3-7               | Suv(3)7   | 8596   | 129   | C   | 2   | probe info |                   | 81.07      | 7.40%         | No    | No               |             |                                                                   |                                                                          | 1.2.3     |                  |        |
| CG15888                                     |           | 15888  | 129   | C   | 3   | probe info |                   | 82.71      | 6.30%         | No    | No               |             |                                                                   |                                                                          | 1.2       |                  |        |
| CG14887                                     |           | 14887  | 129   | C   | 4   | probe info |                   | 84.19      | 8.94%         | No    | No               |             |                                                                   |                                                                          | 1.2.3     |                  |        |

- Gene name from Flybase or based on Blast homology search
- Symbol from Flybase
- CG number
- Well information (plate, row, column)
- RNAi probe information link (see Suppl. fig 2-2)
- Repeated RNAi link (see Suppl. fig 2-3)
- Cell density (number/image) based on DAPI signals
- Mitotic index based on phospho-Histone staining
- Hit list (phenotype reproduced)
- Positive control list (known mitotic genes)
- Phenotype scored manually (see Suppl. fig 2-4)
- Phenotype revealed by computation
- Phenotype & other remarks
- Gallery link (see Suppl. fig 2-5)
- GFP localization gallery link (see Suppl. fig 2-5)
- Modification of information

Searches in the database can be carried out on any of the columns shown, and search statements in multiple columns are executed using a logical 'AND'. Data can be sorted on any column using the up- and down-arrows in the column titles. Searches in numeric fields can be implemented using a range (i.e. 30-40) or using multiple, comma-separated numbers (31,37,38). Hyperlinks link to the spindle galleries (column 14), information on the RNAi probe used (column 5) and repeats (column 6). The columns contain the following information:

(Link 5) Screenshot of the web page describing the RNAi reagents. Primer sequences for every gene tested are given. The hyperlink in the 'plate' field leads to an image of the gel run with dsRNA from that particular plate. Loading was with alternating rows (i.e., order is A1 B1 A2, etc..).

(Link 6) Selecting 'Repeat' in the main page starts a search for all instances in which this gene was tested in the screen.

(Link 11) Searches can be performed on a specific phenotypic description (in this case: Anastral - Clear), by selecting the phenotype and clicking the 'Search' button or pressing Enter.

(Link 14) Galleries (jpg version of the data used to perform the analysis) can be directly accessed from the web interface. Note that the image quality is reduced from the original images due to conversion to the jpg format.

(Link 15) Figures showing the localization of GFP-fusion proteins (if prepared).

[Spindle Screen] [Next]

## Supplemental Figure 2-2

### Link 5 RNAi probe information

The screenshot shows a web browser window displaying RNAi probe information for gene CG7242. The page is titled "Link 5 RNAi probe information" and "Supplemental Figure 2-2". The browser address bar shows the URL: <https://valelab.ucsf.edu/php/abware/general.php?tablename=ran2&rowid=9299>. The page content is divided into two main sections, each with a table of data.

**Left Table:**

|                           |                                                                                                                                                                         |
|---------------------------|-------------------------------------------------------------------------------------------------------------------------------------------------------------------------|
| title                     | CG7242                                                                                                                                                                  |
| sym                       | CG7242                                                                                                                                                                  |
| FBgn                      | 40494                                                                                                                                                                   |
| CG                        | 7242                                                                                                                                                                    |
| FBAn                      | 7242                                                                                                                                                                    |
| biological function (FNC) |                                                                                                                                                                         |
| wild type function        |                                                                                                                                                                         |
| chromid                   | 87D5; Limits computationally determined from genome sequence between P[ <i>lacW</i> : <i>hva55</i> ] <i>2E9</i> and P[ <i>PZ</i> : <i>CBP</i> ] <i>3463</i>             |
| RNA concentrat            |                                                                                                                                                                         |
| left primer               | GCTGTGGAAGACAACAAGAACC                                                                                                                                                  |
| right primer              | TAAAGTGTCCATTGGAAAAGG                                                                                                                                                   |
| left start                | 9                                                                                                                                                                       |
| left end                  | 61,218                                                                                                                                                                  |
| left size                 | 22                                                                                                                                                                      |
| right start               |                                                                                                                                                                         |
| right end                 |                                                                                                                                                                         |
| right size                |                                                                                                                                                                         |
| plate                     | 129                                                                                                                                                                     |
| row                       | A                                                                                                                                                                       |
| multiplate                | CG7340                                                                                                                                                                  |
| multiplate                | 0                                                                                                                                                                       |
| difficult primers         |                                                                                                                                                                         |
| Date entered              | 6/10/2006                                                                                                                                                               |
| cta                       |                                                                                                                                                                         |
| GPD                       |                                                                                                                                                                         |
| RPA                       |                                                                                                                                                                         |
| ASQ                       |                                                                                                                                                                         |
| GLOC                      |                                                                                                                                                                         |
| RD                        |                                                                                                                                                                         |
| RDC ID                    |                                                                                                                                                                         |
| C. elegans hom. length    |                                                                                                                                                                         |
| human homology            |                                                                                                                                                                         |
| human hom. definition     |                                                                                                                                                                         |
| Aflymatrix annotation     | ok                                                                                                                                                                      |
| Aflymatrix S2 index       | 0.10266294                                                                                                                                                              |
| Link                      | <a href="http://valelab.ucsf.edu/php/abware/general.php?tablename=ran2&amp;rowid=9299">http://valelab.ucsf.edu/php/abware/general.php?tablename=ran2&amp;rowid=9299</a> |
| Repeat                    |                                                                                                                                                                         |

**Right Table:**

|                            |                                                                                                                                                                             |
|----------------------------|-----------------------------------------------------------------------------------------------------------------------------------------------------------------------------|
| symbol                     | CG7242                                                                                                                                                                      |
| name                       | CG7242                                                                                                                                                                      |
| original FBgn              | 40494                                                                                                                                                                       |
| original CG                | 7242                                                                                                                                                                        |
| molecular function (MNF)   |                                                                                                                                                                             |
| cellular location (CEL)    |                                                                                                                                                                             |
| chrom                      | 3R                                                                                                                                                                          |
| RNA                        |                                                                                                                                                                             |
| exon size                  |                                                                                                                                                                             |
| right primer               | TAAAGTGTCCATTGGAAAAGG                                                                                                                                                       |
| left start                 | 384                                                                                                                                                                         |
| left end                   | 60,462                                                                                                                                                                      |
| left size                  | 22                                                                                                                                                                          |
| right start                |                                                                                                                                                                             |
| right end                  |                                                                                                                                                                             |
| right size                 |                                                                                                                                                                             |
| plate                      | 129                                                                                                                                                                         |
| row                        | A                                                                                                                                                                           |
| multiplate                 | CG7340                                                                                                                                                                      |
| multiplate                 | 0                                                                                                                                                                           |
| columns                    | 7                                                                                                                                                                           |
| Submitted by               | Head of the Files                                                                                                                                                           |
| id                         |                                                                                                                                                                             |
| RISC                       |                                                                                                                                                                             |
| PDOM                       |                                                                                                                                                                             |
| CLOC                       | 87D5; Limits computationally determined from genome sequence between P[ <i>lacW</i> : <i>hva55</i> ] <i>2E9</i> and P[ <i>PZ</i> : <i>CBP</i> ] <i>3463</i> ; BcDNA.LD37195 |
| SYN                        |                                                                                                                                                                             |
| functions known            |                                                                                                                                                                             |
| C. elegans homology        |                                                                                                                                                                             |
| C. elegans hom. definition |                                                                                                                                                                             |
| human hom. length          |                                                                                                                                                                             |
| Atfy Nr.                   | 154793                                                                                                                                                                      |
| Aflymatrix S2 Avg.         | 3.5778793                                                                                                                                                                   |

**Annotations:**

- "Primer sequence for PCR" with arrows pointing to the left primer (GCTGTGGAAGACAACAAGAACC) and right primer (TAAAGTGTCCATTGGAAAAGG) in the left table.
- "Link: dsRNA gel" with an arrow pointing to the "Link" field in the left table, which contains the URL <http://valelab.ucsf.edu/php/abware/general.php?tablename=ran2&rowid=9299>.

The bottom of the screenshot shows a gel electrophoresis image with multiple lanes, representing the dsRNA gel run for the gene CG7242.

(Link 5) Screenshot of the web page describing the RNAi reagents. Primer sequences for every gene tested are given. The hyperlink in the 'plate' field leads to an image of the gel run with dsRNA from that particular plate. Loading was with alternating rows (i.e., order is A1 B1 A2, etc.).



## Supplemental Figure 2-4

Search **11** e.g. "Anastral, Clear"

The screenshot shows a web-based database interface with a search bar containing '11' and the text 'e.g. "Anastral, Clear"'. A red arrow points to the search input field. The interface displays a table of search results with columns for gene name, symbol, coordinates, and various phenotypic descriptions. The table includes entries for SAKT144-GG, polo, centrosomin, Spc2-GG, and unknown-GG. The 'polo' entry has a detailed description: 'I bet this is very similar to polo phenotype. - Clear Anastral spindle but polo is very well focused.' The 'centrosomin' entry has a description: 'This phenotype is very similar to centrosomin, maybe centrosomin belt. - Clear Anastral - Clear Misalign - Weak Dimmer g-sub signals - Clear anastral - Clear monoastral bipolar - Clear'. The 'unknown-GG' entry has a description: 'Monoastral bipolar - Clear Anastral - Clear'. The interface also shows a 'View' dropdown menu with options like 'Gohta', 'Edit views', and 'Import Data'. The table has 15 columns and 5 rows of data.

| name        | symbol  | CG    | plate | row | col | RNAi probe | repeats | cell coverage | mitotic index | hit | positive control | manual hits                                                                                                                                       | computer hits                 | remarks                                                                                                                                                                                                 | gallery | SPY localization | Act |
|-------------|---------|-------|-------|-----|-----|------------|---------|---------------|---------------|-----|------------------|---------------------------------------------------------------------------------------------------------------------------------------------------|-------------------------------|---------------------------------------------------------------------------------------------------------------------------------------------------------------------------------------------------------|---------|------------------|-----|
| SAKT144-GG  | SAK     | 7186  | 33    | H   | 4   | probe info |         | 158.31        | 5.09%         | Yes | Yes              | Anastral bipolar - Clear<br>Anastral<br>Anastral - Clear<br>Monoastral bipolar                                                                    | monopolar                     | anastral - Clear<br>monoastral bipolar - Clear                                                                                                                                                          | 1 2 3   |                  |     |
| polo        | polo    | 12306 | 62    | B   | 11  | probe info |         | 63.02         | 8.47%         | Yes | Yes              | Anastral<br>Anastral - Clear                                                                                                                      | monopolar<br>dim gub in poles | I bet this is very similar to polo phenotype. - Clear<br>Anastral spindle but polo is very well focused.                                                                                                | 1 2 3   |                  |     |
| centrosomin | cnm     | 4832  | 107   | H   | 11  | probe info |         | 160.52        | 5.01%         | Yes |                  | Anastral<br>Anastral - Clear                                                                                                                      |                               | This phenotype is very similar to centrosomin, maybe centrosomin belt. - Clear<br>Anastral - Clear<br>Misalign - Weak<br>Dimmer g-sub signals - Clear<br>anastral - Clear<br>monoastral bipolar - Clear | 1 2     |                  |     |
| Spc2-GG     | CG17286 | 17286 | 122   | B   | 9   | probe info |         | 80.92         | 7.59%         | Yes | No               | Dim g-sub<br>Misalign<br>Misalign - Weak<br>Monoastral bipolar - Clear<br>Anastral<br>Anastral - Clear<br>Dim g-sub - Clear<br>Monoastral bipolar |                               |                                                                                                                                                                                                         | 1 2     |                  |     |
| unknown-GG  | C06631  | 6631  | 134   | B   | 11  | probe info | Repeat  | 99.33         | 9.64%         | Yes | No               | Monoastral bipolar - Clear<br>Anastral<br>Anastral - Clear<br>Monoastral bipolar                                                                  | monopolar                     | Monoastral bipolar - Clear<br>Anastral - Clear<br>Anastral - Clear                                                                                                                                      | 1 2 3 4 |                  |     |

(Link 11) Searches can be performed on a specific phenotypic description (in this case: Anastral - Clear), by selecting the phenotype and clicking the 'Search' button or pressing Enter.

[\[Previous\]](#) [\[Spindle Screen\]](#)

## Supplemental Figure 2-5

Link **14** Metaphase spindle gallery

Link **15** GFP gallery

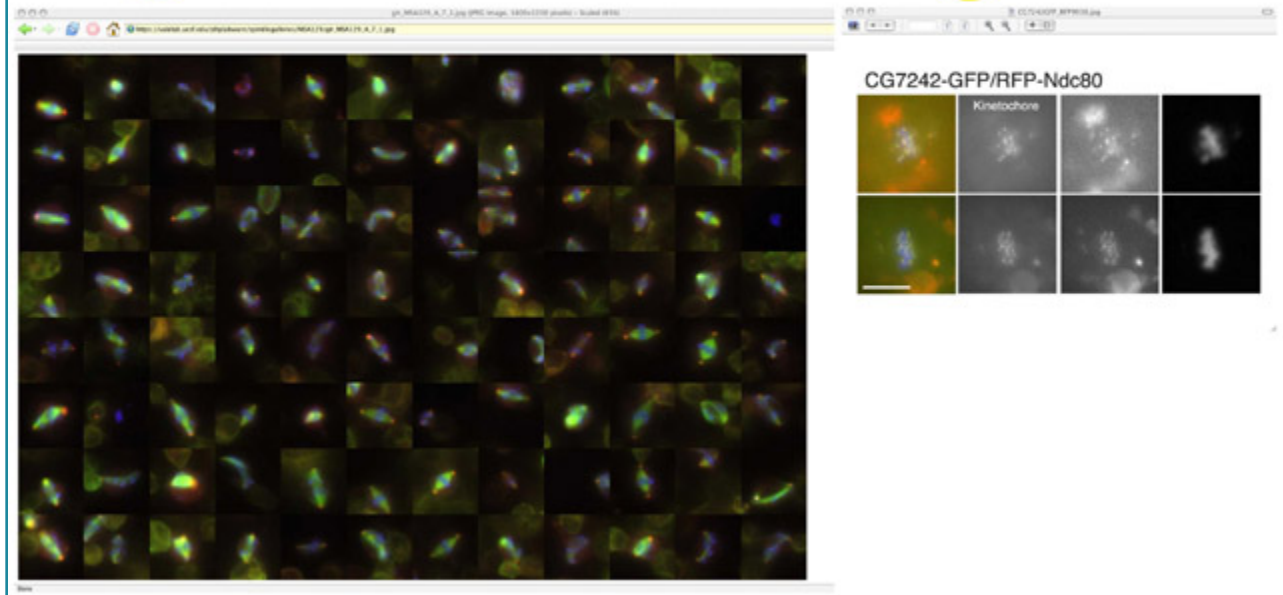

(Link 14) Galleries (jpg version of the data used to perform the analysis) can be directly accessed from the web interface. Note that the image quality is reduced from the original images due to conversion to the jpg format.

(Link 15) Figures showing the localization of GFP-fusion proteins (if prepared).

[\[Previous\]](#) [\[Spindle Screen\]](#)
