# Supplementary material
Source: PubMed Central journal article supplement (PMC2837481)
Supplement: NIHMS181537-supplement-Spindle_RNAi-URL.pdf [file NIHMS181537-supplement-Spindle_RNAi-URL.pdf]

Supporting Online material for:

## Genes Required for Mitotic Spindle Assembly in *Drosophila* S2 Cells

Gohta Goshima, Roy Wollman, Sarah S. Goodwin, Nan Zhang, Jonathan M. Scholey, Ronald D. Vale, and Nico Stuurman

- ▶ [Online database](#)
- ▶ [How to use the database](#)
- ▶ [Hit List \(summary, pdf\)](#)
- ▶ [Hit List \(database\)](#)
- ▶ [GFP Localization](#)
- ▶ [Analysis code](#)

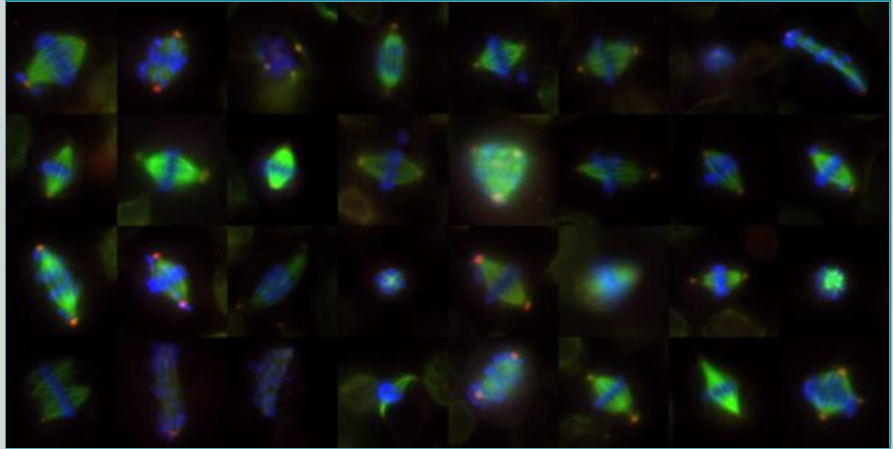

**Note:** Always compare phenotypes in the database to neighboring wells as there is significant variation between plates.

[\[Vale lab RNAi updates\]](#) [\[Database enquiries\]](#) [\[Phenotype enquiries\]](#)

Now Viewing Table: MitoSpindleScreen

16394 Records found. Showing 1 through 12.

12 Records per page

| name                        | symbol  | CG    | plate | row | col | RNAI probe | repeats | cells/image | mitotic index | hit | re-imaged | positive control | cd-RN |
|-----------------------------|---------|-------|-------|-----|-----|------------|---------|-------------|---------------|-----|-----------|------------------|-------|
|                             | CG13589 | 13589 | 113   | G   | 2   | probe info |         | 86.07       | 0.00%         | No  |           |                  | -     |
|                             |         |       | 146   | F   | 2   | probe info |         | 123.44      | 6.93%         | No  |           |                  | -     |
|                             |         |       | 146   | F   | 1   | probe info |         | 141.11      | 9.00%         | No  |           |                  | -     |
| folded gastrulation         | fog     | 9559  | 146   | E   | 11  | probe info |         | 56.47       | 12.25%        | No  |           |                  | -     |
|                             | CG12446 | 12446 | 146   | E   | 10  | probe info |         | 183.69      | 4.96%         | No  |           |                  | -     |
|                             | CG17601 | 17601 | 146   | E   | 9   | probe info |         | 204.33      | 6.80%         | No  |           |                  | -     |
|                             | CG10677 | 10677 | 116   | G   | 11  | probe info | Repeat  | 148.79      | 6.39%         | No  |           | No               | -     |
|                             | CG14617 | 14617 | 146   | E   | 8   | probe info |         | 213.58      | 2.58%         | No  |           |                  | -     |
|                             | CG12576 | 12576 | 146   | E   | 7   | probe info |         | 187.83      | 6.33%         | No  |           |                  | -     |
|                             | CG14615 | 14615 | 146   | E   | 6   | probe info |         | 191.61      | 3.70%         | No  |           |                  | -     |
| DISCO Interacting Protein 1 | DIP1    | 17686 | 146   | E   | 5   | probe info |         | 58.47       | 6.51%         | No  |           |                  | -     |
|                             | CG32822 | 32822 | 146   | E   | 4   | probe info |         | 162.61      | 6.99%         | No  |           |                  | -     |

**Table S1: List of mitotic genes identified in the screen**

**Centrosome/ $\gamma$ -Tubulin**

| Phenotype                                    | Novelty           | CG #                                                                                                                               | <i>Drosophila</i> name | Human homologue         | Function                       | S2 metaphase localization                       | Other phenotypes   |
|----------------------------------------------|-------------------|------------------------------------------------------------------------------------------------------------------------------------|------------------------|-------------------------|--------------------------------|-------------------------------------------------|--------------------|
| Anastral & Monostral bipolar                 | Expected          | 7186                                                                                                                               | Sak                    | Plk4                    | Kinase                         | Centriole (C)                                   |                    |
|                                              |                   | 10061                                                                                                                              | DSas-4                 | CPAP                    |                                | Centriole (N & C)                               |                    |
|                                              |                   | 15524 <sup>w</sup>                                                                                                                 | Sas-6                  | Sas-6                   |                                |                                                 |                    |
|                                              | Novel             | 6631                                                                                                                               | Ana1                   |                         | Centriole (N)<br>Whole cell(C) |                                                 |                    |
|                                              |                   | 8262 <sup>w</sup>                                                                                                                  | Ana2                   |                         | Centriole (N & C)              |                                                 |                    |
| 13162 <sup>w</sup>                           | Ana3              |                                                                                                                                    |                        |                         |                                |                                                 |                    |
| Dim $\gamma$ -tubulin (Centrosome)           | Expected          | 4832                                                                                                                               | Cnn                    |                         | $\gamma$ -tubulin recruitment  | Centrosome <sup>3</sup>                         | Pole detachment    |
|                                              |                   | 12306                                                                                                                              | Polo                   | Plk1                    | Kinase                         |                                                 |                    |
|                                              |                   | 17286 (18217)                                                                                                                      | Spd-2                  | Cep192                  |                                |                                                 |                    |
|                                              | Unexpected        | 32782 <sup>w</sup> <sup>v</sup>                                                                                                    | Tlk                    | Tousled-like kinase     | Kinase                         |                                                 | Misalign           |
| Novel                                        | 6118 <sup>w</sup> |                                                                                                                                    |                        | Transcription factor    |                                |                                                 |                    |
| Dim $\gamma$ -tubulin (Centrosome + Spindle) | Expected          | $\gamma$ -Tubulin small complex ( $\gamma$ TuSC) (CG3157/ $\gamma$ Tub23C, CG3917/Dgrip84, CG10988/dd4/Dgrip91)                    |                        |                         | MT nucleation                  | Centrosome <sup>3</sup><br>Spindle <sup>3</sup> | Monopolar Long SP  |
|                                              | Unexpected        | 1135 <sup>w</sup> <sup>v</sup>                                                                                                     |                        | Microspherule protein 1 | rRNA transcription             | Whole cell(N)                                   |                    |
|                                              | Novel             | 18041 <sup>w</sup> <sup>v</sup>                                                                                                    | Dgt1                   | LOC54934                |                                | Whole cell (N & C)                              |                    |
|                                              |                   | 16969                                                                                                                              | Dgt2                   |                         |                                | Spindle (N & C)                                 |                    |
| Dim $\gamma$ -tubulin (Spindle)              | Expected          | $\gamma$ -Tubulin ring complex ( $\gamma$ TuRC) outer subunits (CG5688/Dgrip163, CG6176/Dgrip75, CG9201/Dgrip128, CG10346/Dgrip71) |                        |                         | MT nucleation                  | Centrosome <sup>3</sup><br>Spindle <sup>3</sup> | Long SP            |
|                                              | Novel             | 3221                                                                                                                               | Dgt3                   |                         |                                | Whole cell (N & C)                              |                    |
|                                              |                   | 4865                                                                                                                               | Dgt4                   |                         |                                | Spindle (N & C)                                 |                    |
|                                              |                   | 8828                                                                                                                               | Dgt5                   |                         |                                |                                                 |                    |
|                                              |                   | 11881                                                                                                                              | Dgt6                   | FAM29A                  |                                |                                                 |                    |
| Dim MT                                       | Expected          | Tubulin (3)                                                                                                                        |                        |                         |                                | Spindle <sup>3</sup>                            | Monopolar Short SP |
|                                              |                   | Tubulin chaperone (8)                                                                                                              |                        |                         |                                |                                                 |                    |

**Spindle shape**

| Phenotype  | Novelty    | CG #  | <i>Drosophila</i> name | Human homologue | Function    | S2 metaphase localization                        | Other phenotypes     |
|------------|------------|-------|------------------------|-----------------|-------------|--------------------------------------------------|----------------------|
| Monopolar  | Expected   | 9191  | Klp61F                 | Eg5/Kinesin-5   | MT sliding  | Spindle <sup>3</sup>                             |                      |
| Multipolar | Expected   | 7831  | Ncd                    | HSET/Kinesin-14 | MT sliding  | Spindle <sup>3</sup><br>MT plus-end <sup>3</sup> | Unfocused spindle MT |
|            |            | 4454  | Borealin               | Borealin        | Passenger   | Centromere <sup>3</sup>                          | Monopolar Few M      |
|            |            | 6620  | Ial                    | Aurora-B        |             |                                                  |                      |
|            |            | 12165 | Incnp                  | INCENP          |             |                                                  |                      |
|            | Unexpected | 1258  | Pav-KLP                | MKLP1/Kinesin-6 | MT bundling | Centrosome <sup>3</sup>                          | Cytokinesis failure  |
| 13345      | RacGAP50c  |       | GAP                    |                 |             |                                                  |                      |

|                       |            |                                                                         |                 |              |                         |                                                                |                                     |                                        |
|-----------------------|------------|-------------------------------------------------------------------------|-----------------|--------------|-------------------------|----------------------------------------------------------------|-------------------------------------|----------------------------------------|
| Monastral bipolar     | Unexpected | 9045                                                                    | Myb             | Myb          | Transcription factor    | Whole cell (N & C)                                             | Long SP<br>Pole detachment<br>Few M |                                        |
|                       |            | 3480 <sup>w</sup>                                                       | Twit/<br>Mip130 | Lin-9 family | Myb-interacting         |                                                                | Long SP                             |                                        |
|                       |            | 2013                                                                    | UbcD6           | E2A/hRad6    | E2                      |                                                                |                                     |                                        |
|                       |            | Proteasome (10)                                                         |                 |              |                         |                                                                | Whole cell [Mov34] (N & C)          | Dim $\gamma$ -tub<br>Short SP<br>Few M |
|                       |            | 17291                                                                   | PP2A-29B        | PR65         | PP2A regulatory subunit |                                                                | Defective overall<br>Few M          |                                        |
|                       |            | 4494 <sup>v</sup>                                                       | Sm3             | SUMO         |                         |                                                                |                                     |                                        |
| Unfocused spindle MTs | Expected   | 6875                                                                    | Asp             | ASPM         | MT binding              | Spindle pole <sup>3</sup>                                      | Pole detachment                     |                                        |
|                       | Unexpected | 8472                                                                    | CaM             | Calmodulin   | Ca binding              | Spindle pole (N & C)                                           |                                     |                                        |
| Pole detachment       | Expected   | Dynein/dynactin (CG1938/Dlic2, CG7507/Dhc64C, CG8269/Dmn, CG9206/Glued) |                 |              |                         | Whole cell <sup>3</sup><br>Unattached kinetochore <sup>3</sup> |                                     |                                        |
|                       | Unexpected | 7007 <sup>w</sup>                                                       | VhaPPA1-1       |              | Vacuolar H - transport  |                                                                |                                     |                                        |

### Spindle length

| Phenotype     | Novelty     | CG #                                              | <i>Drosophila</i> name | Human homologue | Function             | S2 metaphase localization                             | Other phenotypes                         |                    |
|---------------|-------------|---------------------------------------------------|------------------------|-----------------|----------------------|-------------------------------------------------------|------------------------------------------|--------------------|
| Long spindle  | Expected    | 1453                                              | Klp10A                 | MCAK/Kinesin-13 | MT depolymerization  | Spindle pole <sup>3</sup><br>Kinetochore <sup>3</sup> |                                          |                    |
|               | Unexpected  | 5785                                              | Thr                    | Separase        | Protease             |                                                       | Few M                                    |                    |
|               |             | 11006                                             | Sap130                 |                 |                      |                                                       |                                          |                    |
|               |             | 4654 <sup>v</sup>                                 | Dp                     |                 | Transcription factor |                                                       |                                          |                    |
|               |             | 10800 <sup>v</sup>                                | Rca1                   | Rca1            | APC inhibition       |                                                       | Few M<br>Defective overall               |                    |
|               |             | RNA polymerase II (7) <sup>IV</sup>               |                        |                 |                      |                                                       | Whole cell [RpII33] (N & C)              | Misalign<br>Few M  |
| Short spindle | Expected    | 5000                                              | Msp                    | Dis1/XMAP215    | MT polymerization    | Centrosome <sup>3</sup>                               | Monopolar                                |                    |
|               |             | 32435                                             | Mast/Orbit             | CLASP           |                      | Kinetochore + Spindle (N)<br>Whole cell(C)            |                                          |                    |
|               |             | 3265                                              | EB1                    | EB1             |                      | Centrosome <sup>3</sup><br>MT plus-end <sup>3</sup>   |                                          |                    |
|               | Unexpected  | 3992 <sup>wv</sup>                                | Srp                    |                 | GATA-like            |                                                       |                                          |                    |
|               |             | Ribosome & translation factors (54) <sup>II</sup> |                        |                 |                      |                                                       | Whole cell [RpL11, RpL12, RpL19] (N & C) | Monopolar<br>Few M |
|               |             | 10648                                             | RBM13                  | Mak16           | Ribosome biogenesis  |                                                       | Monopolar                                |                    |
|               |             | 12396                                             | Nnp-1                  |                 |                      |                                                       |                                          |                    |
|               |             | 5650                                              | Pp1-87B                | PP1             | Phosphatase          |                                                       |                                          |                    |
|               |             | 8222 <sup>w</sup>                                 | Pvr                    |                 | Receptor-related     |                                                       |                                          |                    |
|               |             | Novel                                             | 14781                  | <i>Ssp1</i>     |                      |                                                       | Spindle (N)                              | Monopolar          |
|               | 9028        |                                                   | <i>Ssp2</i>            |                 |                      |                                                       |                                          |                    |
|               | 18397       |                                                   | <i>Ssp3</i>            |                 |                      | Spindle (N & C)                                       |                                          |                    |
|               | 33130       |                                                   | <i>Ssp4</i>            |                 |                      |                                                       |                                          |                    |
| 14735         | <i>Ssp5</i> |                                                   |                        |                 |                      |                                                       |                                          |                    |

### Chromosome structure and alignment

| Phenotype                      | Novelty              | CG #              | <i>Drosophila</i> name                 | Human homologue       | Function              | S2 metaphase localization                      | Other phenotypes              |               |
|--------------------------------|----------------------|-------------------|----------------------------------------|-----------------------|-----------------------|------------------------------------------------|-------------------------------|---------------|
| Chromosome misalignment        | Expected             | 13329             | Cid                                    | CENP-A                | Histone H3 variant    | Kinetochores <sup>3</sup>                      | Long SP                       |               |
|                                |                      | 31258             | CENP-C                                 | CENP-C                | Kinetochores assembly | Kinetochores(N)                                | Long SP Pole detachment       |               |
|                                |                      | 7838              | Bub1                                   | Bub1                  |                       |                                                |                               |               |
|                                |                      | 7581              | Bub3                                   | Bub3                  |                       |                                                |                               |               |
|                                |                      | 10923             | Klp67A                                 | KIF18/Kinesin-8       | MT depolymerization   | Kinetochores <sup>3</sup> Spindle <sup>3</sup> | Long SP Monastral bipolar     |               |
|                                |                      | 4008 <sup>w</sup> | Rad21                                  | hRad21/hScc1          | Chromatid cohesion    |                                                |                               |               |
|                                |                      | 8598 <sup>w</sup> | Deco                                   | EFO1                  |                       |                                                |                               |               |
|                                |                      | 1763 <sup>w</sup> | Nod                                    | Kid/Kinesin-10        | DNA-bd kinesin        |                                                |                               |               |
|                                |                      | 6392 <sup>w</sup> | CENP-meta                              | CENP-E/Kinesin-7      | Kinetochores kinesin  |                                                |                               |               |
|                                | 8590 <sup>w</sup>    | Klp3A             | KIF4/Kinesin-4                         | Chromokinesin         |                       |                                                |                               |               |
|                                | 9633                 | RpA-70            |                                        |                       |                       |                                                |                               |               |
|                                | 8374                 | Dmt               |                                        |                       |                       | Chromatin (N & C)                              | Long SP                       |               |
|                                | 7269                 | Hel25E            |                                        | RNA helicase          |                       |                                                |                               |               |
|                                | 5838 <sup>w</sup>    | Dref              |                                        | Transcription factor  |                       |                                                |                               |               |
|                                | 7626 <sup>w</sup>    | Spt5              |                                        |                       |                       |                                                |                               |               |
|                                | 6513 <sup>w</sup>    | Endosulfine       |                                        |                       |                       |                                                |                               |               |
|                                |                      |                   | RNA splicing factor (21) <sup>II</sup> |                       |                       |                                                | Whole cell [U2af38] (N & C)   | Long SP Few M |
|                                | 1242                 | Hsp83             |                                        | Heat shock protein    |                       |                                                |                               |               |
|                                | 6546 <sup>v</sup>    | Bap55             | Arp6                                   | Nuclear actin-like    |                       |                                                |                               |               |
|                                | 10377 <sup>v</sup>   | Hrb27             | Daz-associated                         | Ribonucleoprotein     |                       |                                                |                               |               |
|                                | 10385 <sup>wv</sup>  | Msl-1             |                                        | Dosage compensation   |                       |                                                |                               |               |
|                                | 3241 <sup>wv</sup>   | Msl-2             |                                        |                       |                       |                                                |                               |               |
|                                | 15095 <sup>wv</sup>  |                   |                                        | Phosphate transporter |                       | Membrane (N & C)                               | Long SP                       |               |
|                                | 4029 <sup>wv+1</sup> | Jumeau            |                                        |                       |                       | Whole cell + Chromatin (N)                     |                               |               |
|                                | 1081 <sup>v</sup>    | RheB              | RheB                                   | GTPase                |                       |                                                | Few M                         |               |
|                                | 4320 <sup>v</sup>    | Raptor            | Raptor                                 | mTOR associated       |                       |                                                |                               |               |
|                                | 5380 <sup>wv</sup>   |                   |                                        | RPase III             |                       |                                                | Few M                         |               |
|                                |                      | Novel             | 9938                                   | <i>Ndc80*</i>         | Ndc80/HEC1            |                                                | Kinetochores (N & C)          | Long SP       |
|                                |                      |                   | 8902                                   | <i>Nuf2*</i>          | Nuf2                  |                                                | Whole cell(N) Kinetochores(C) |               |
|                                |                      |                   | 7242                                   | <i>Cal2</i>           | Spc25?                |                                                | Kinetochores(C)               |               |
|                                |                      |                   | 18156                                  | <i>Mis12*</i>         | Mis12                 |                                                | Kinetochores (N & C)          |               |
|                                |                      |                   | 5148                                   | <i>Call</i>           |                       |                                                |                               |               |
|                                | 13550                |                   |                                        |                       |                       |                                                |                               |               |
|                                | 11451                |                   |                                        |                       |                       | Defective overall                              |                               |               |
| Chromosome condensation defect | Expected             | 1911              | CAP-D2                                 | hCAP-D2               | Condensin             | Chromosome <sup>3</sup>                        | Misalign                      |               |
|                                |                      | 10212             | SMC2                                   | SMC2                  |                       |                                                |                               |               |
|                                |                      | 10726             | Barren                                 | hCAP-H                |                       |                                                |                               |               |
|                                |                      | 11397             | Glu                                    | SMC4                  |                       |                                                |                               |               |
|                                |                      | 17054             | CAP-G                                  | CAP-G                 |                       |                                                |                               |               |
|                                |                      | 10223             | Top2                                   | Topo II               | Topoisomerase         |                                                |                               |               |
| Compact chromatin              | Unexpected           | 8171              | Dup                                    | Cdt1                  |                       |                                                | Few M                         |               |

Long SP = Long spindle: Short SP = Short spindle: Misalign = Chromosome misalignment: Few M = Few mitotic cells (low mitotic index and/or low cell number): N = GFP was tagged at N-terminus of the gene: C = GFP was tagged at C-terminus of the gene.

w: Weak phenotype

★: *Drosophila* homolog identified after the screen by bioinformatics

∇: Phenotype was observed only in the presence of Cdc27 dsRNA

∃: Localization was determined in prior studies

Π: Likely indirect effects of general defects in protein synthesis

( ): Numbers in parenthesis after gene name indicates how many subunits showed RNAi phenotypes. See Data S1 for the gene list.

\*1: CG4029/Jumu RNAi showed misalignment phenotype in the presence of Cdc27 dsRNA, but predominantly multipolar spindles in the absence of Cdc27.

Note: This table only lists genes that produced identical phenotypes in the primary screen and one or more secondary screens. Unexpected/novel genes were tested in the secondary screen with a non-overlapping dsRNA (see Methods section in this Supplemental Materials). This inventory of mitotic genes is undoubtedly incomplete as only a small subset of the weak phenotypes in the primary screen were pursued. In addition, a number of clear phenotypes from the primary screen are not included here because the secondary screen did not yield an identical, unambiguous phenotype. All of the data from primary and secondary screening (as well as GFP localization) can be accessed at our www site (<http://rna.ucsf.edu/mitospindlescreen>).

[back to homepage](#)

# MitoSpindleScreen code

After working with Gohta Goshima and Nico Stuurman from the Vale lab on the [spindle length](#) project, we decided to continue the collaboration and extend our work to a genome wide screen. You can read about this screen in a recent Science article [here](#).

Below you can find all the source code that was used for image storing and analysis in the MitoSpindleScreen project.

For the web interface that was used in the screen, please check out Nico's excellent tool: [phplabware](#)

This is an overview of the analysis pipeline:

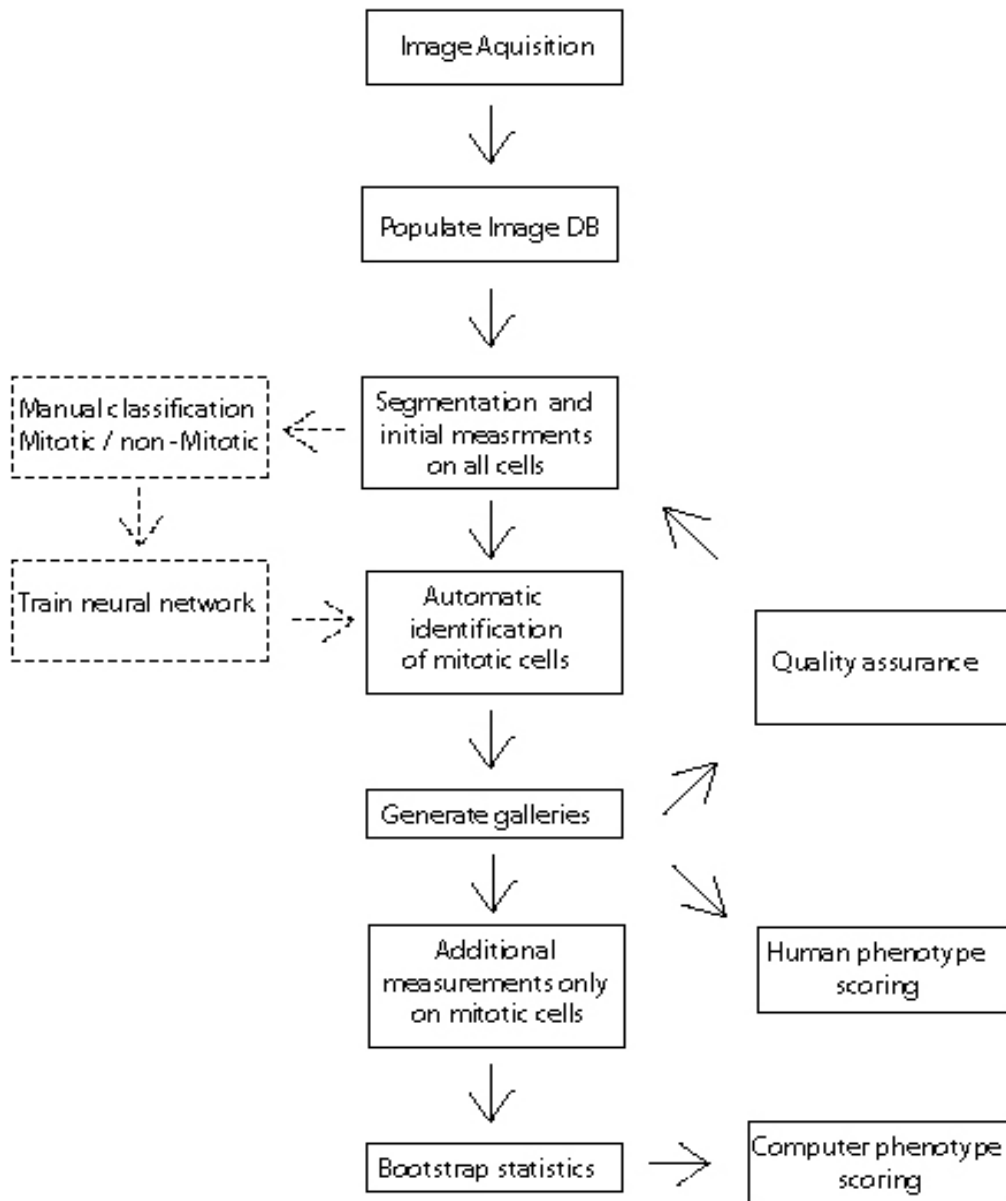

This pipeline was implemented using multiple matlab scripts and functions that perform the different analysis steps.

Overall the code includes many aspects of the computational infrastructure needed for a genome wide screen:

- Database utilities
- Segmentation
- Classification
- Gallery generation
- Graphical User Interface for phenotype assignment
- Quality assurance (QA) and html reports
- Quantitative measurement and statistics
- Data exploitation

html docs of all the matlab source code is [here](#).

An overview of how database table structure can be seen [here](#).

The code was developed for the purpose of this screen only, which has pros and cons. We made many 'shortcuts' because we were concentrated on a specific solution and did not aim to create a general tool for genome wide screens. Because of that, our >6500 lines of code will be hard to reuse. To help with its future reusability I tried to organize the files into meaningful folders, rename some files, and add documentation where appropriate. That might have 'broken' a few things, but since I don't expect this code to be usable 'as is' in any case I thought that would be better than just a pile of unreadable code...

a tarball of all m-files is [here](#).

For the biological results of this screen, go to: <http://rnai.ucsf.edu/mitospindlescreen>
